# Supplementary material for: Effects of ursodeoxycholic acid on the gut microbiome and colorectal adenoma development
Source: PubMed Central journal article supplement (PMC6382922; doi:10.1002/cam4.1965), 2019-01-16

(a) weighted UniFrac PCoA

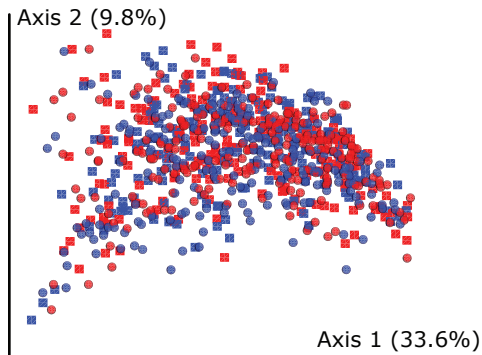

(b) unweighted UniFrac PCoA

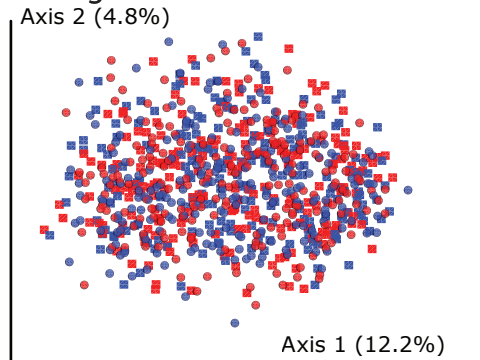

(c) Bray-Curtis PCoA

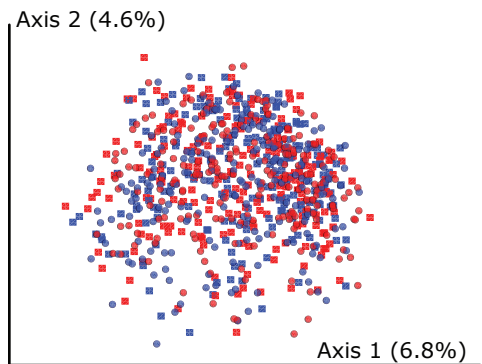

(d) Jaccard PCoA

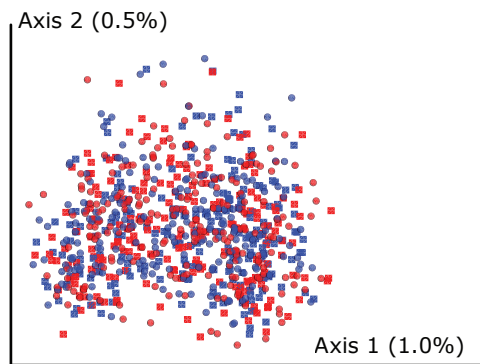

Supplement: CAM4-8-617-s001.pdf [file CAM4-8-617-s001.pdf]
